# Supplementary material for: Atomically dispersed Cu coordinated Rh metallene arrays for simultaneously electrochemical aniline synthesis and biomass upgrading
Source: Springer Nature journal article supplement (doi:10.1038/s41467-023-41423-2), 2023-09-14
Supplement: MOESM1 [file 41467_2023_41423_MOESM1_ESM.pdf]

Supplementary Information for

**Atomically dispersed Cu coordinated Rh metallene arrays for simultaneously  
electrochemical aniline synthesis and biomass upgrading**

Qiqi Mao<sup>1</sup>, Xu Mu<sup>1</sup>, Wenxin Wang<sup>1</sup>, Kai Deng<sup>1</sup>, Hongjie Yu<sup>1</sup>, Ziqiang Wang<sup>1</sup>, You Xu<sup>1</sup>, Liang

Wang<sup>1</sup> and Hongjing Wang<sup>1\*</sup>

<sup>1</sup>. State Key Laboratory Breeding Base of Green-Chemical Synthesis Technology, College of Chemical Engineering, Zhejiang University of Technology, Hangzhou 310014, P. R. China.

\*Corresponding author

E-mail: hjw@zjut.edu.cn

## Supplementary method

**DFT calculations:** Based on experimental results, the Cu<sub>SA</sub>-Rh MAs display the single-phase *fcc* crystal structure and single-atom alloy structure. In the DFT simulation process, the Rh model is firstly constructed, and the Cu single-atom is induced with a random distribution, we used the *fcc* cubic phase of the original Rh as a template to build a 3×3×3 supercell containing 108 atoms for Cu<sub>SA</sub>-Rh MAs, the atom ratio of Rh : Cu is approximately 93 : 7. The present first principle DFT calculations are performed by Vienna Ab initio Simulation Package (VASP) with the projector augmented wave (PAW) method<sup>1,2</sup>. Structural optimization calculations were performed by VASP with the PAW method. The exchange-functional is treated using the generalized gradient approximation (GGA) of Perdew-Burke-Emzerhof (PBE) functional<sup>3</sup>. The energy cutoff for the plane wave basis expansion was set to 400 eV and the force on each atom less than 0.05 eV/Å was set for convergence criterion of geometry relaxation. Grimme's DFT-D3 methodology<sup>4</sup>. was used to describe the dispersion interactions. Partial occupancies of the Kohn-Sham orbitals were allowed using the Gaussian smearing method and a width of 0.05 eV. The Brillouin zone was sampled with Monkhorst mesh 3 × 3 × 1 through all the computational process. The self-consistent calculations apply a convergence energy threshold of 10<sup>-5</sup> eV. A 15 Å vacuum space along the z direction was added to avoid the interaction between the two neighboring images. The free energy changes ( $\Delta G$ ) of each elementary reaction step during Ph-NO<sub>2</sub> ERR/MOR were calculated using the computational hydrogen electrode (CHE) model. In this model, the chemical potential is equal to the energy of half of the gas-phase H<sub>2</sub> at 0 V vs reversible hydrogen electrode (RHE). The electrode potential, U verse RHE, is taken into consideration by adding -eU when an electron transforming step occurs. That is  $G(U) = G(0\text{ V}) - neU$ , where e is the elementary charge of an electron, n is the

number of proton-electron pairs transferred, and  $U$  is the applied potential. The Gibbs free energy was calculated by the following Supplementary equation (1):

$$\Delta G = \Delta E + \Delta E_{\text{ZPE}} - T\Delta S \quad (1)$$

Where the value of  $\Delta E$ ,  $\Delta E_{\text{ZPE}}$  and  $\Delta S$  denotes the changes of DFT energy, the zero-point energy and the entropy at 298.15 K, respective.

The adsorption energy ( $E_{\text{ads}}$ ) of adsorbate was defined as Supplementary equation (2):

$$E_{\text{ads}} = E_{\text{Total}} - E_{\text{surf}} - E_{\text{adsorbate}} \quad (2)$$

where  $E_{\text{total}}$ ,  $E_{\text{surf}}$  and  $E_{\text{adsorbate}}$  are the energy of adsorbate adsorbed on the surface, the energy of clean surface, and the energy of isolated molecule in a cubic periodic box, respectively.

A climbing image nudged elastic band (CI-NEB) method was used to locate the transition states with the same convergence standard.

## Supplementary Figures

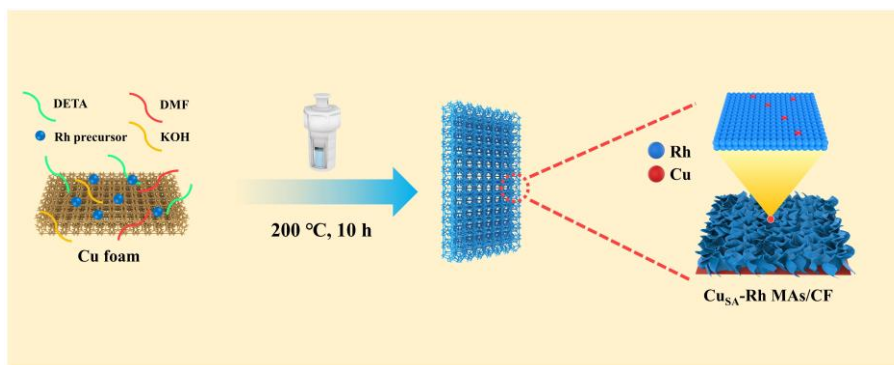

**Supplementary Fig. 1. Synthesis diagram.** Schematic diagram of the synthesis process for formed Cu<sub>SA</sub>-Rh MAs/CF.

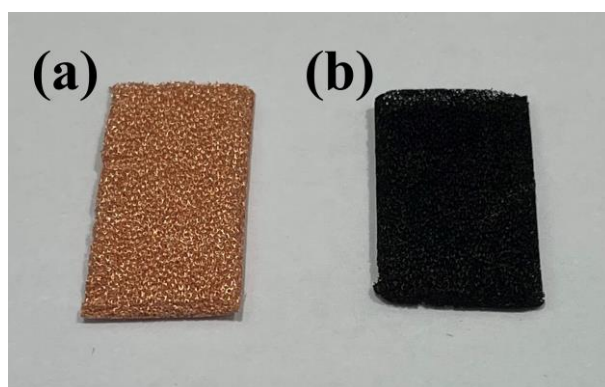

**Supplementary Fig. 2. Digital photo of samples.** The digital photo of (a) CF and (b) Cu<sub>SA</sub>-Rh MAs/CF.

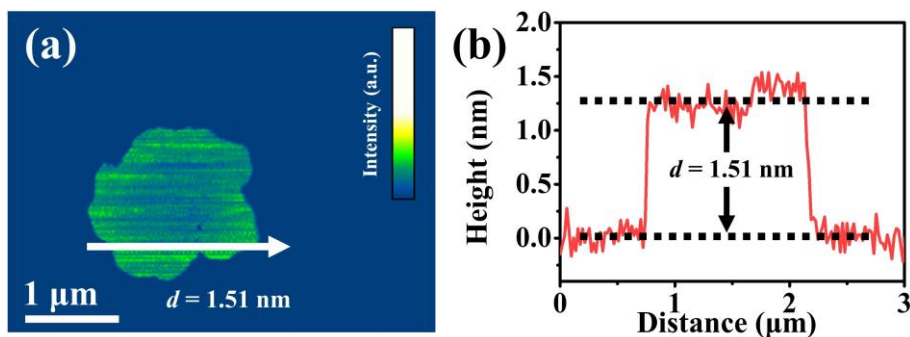

**Supplementary Fig. 3. AFM characterization of Cu<sub>SA</sub>-Rh MAs.** (a) AFM image and (b) corresponding height profile of Cu<sub>SA</sub>-Rh MAs.

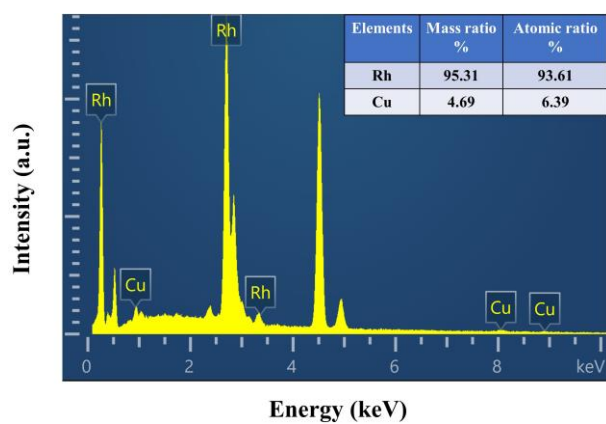

**Supplementary Fig. 4. EDX spectrum analysis.** EDX spectrum of Cu<sub>SA</sub>-Rh MAs.

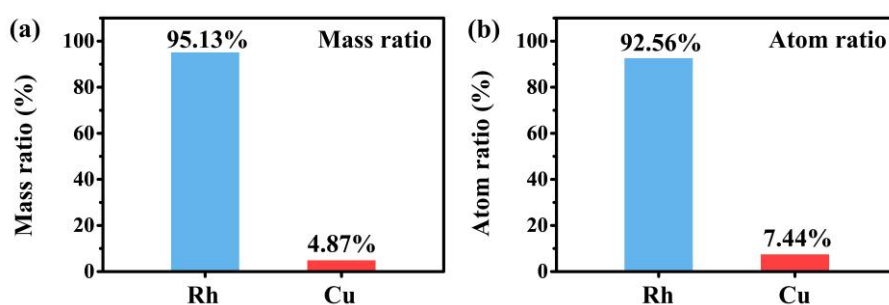

**Supplementary Fig. 5. ICP-OES tests.** (a) Mass ratio and (b) atom ratio of Rh and Cu elements in Cu<sub>SA</sub>-Rh MAs obtained from ICP-OES.

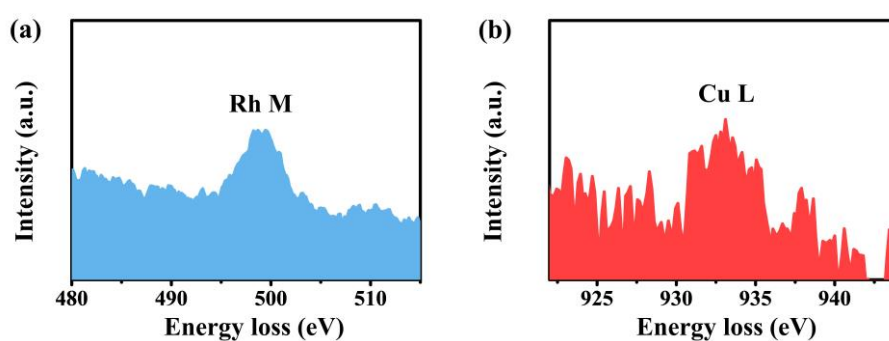

**Supplementary Fig. 6. EELS tests.** (a and b) The EELS spectra of Rh and Cu in Cu<sub>SA</sub>-Rh MAs.

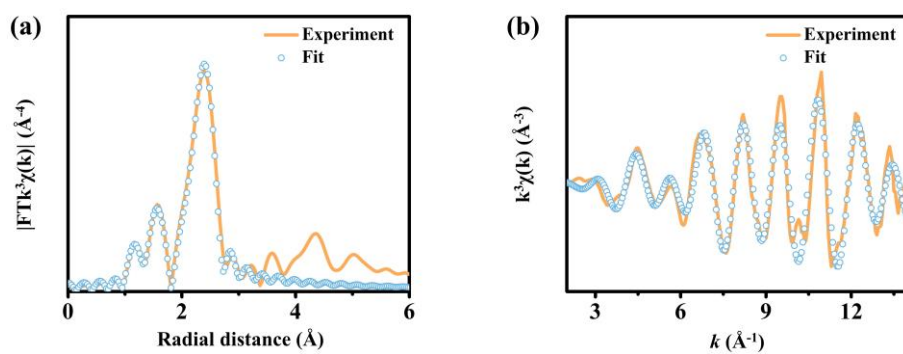

**Supplementary Fig. 7. EXAFS spectra of Cu<sub>SA</sub>-Rh MAs.** Rh *K*-edge experimental and fitting Fourier transformed EXAFS spectra of Cu<sub>SA</sub>-Rh MAs at (a) *R* space and (b) *K* space.

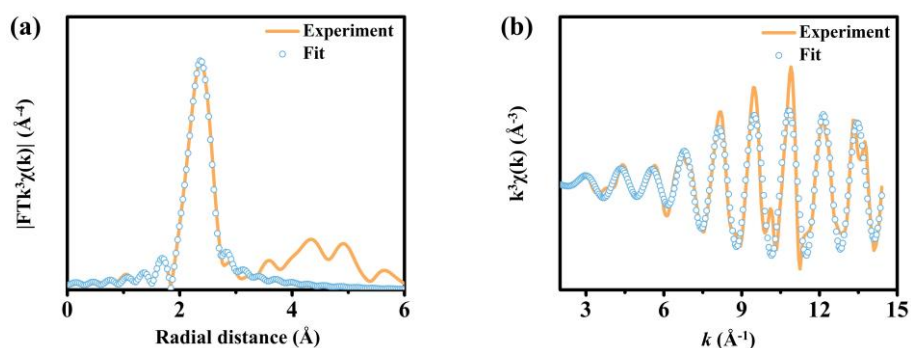

**Supplementary Fig. 8. EXAFS spectra of Rh foil.** Rh *K*-edge experimental and fitting Fourier transformed EXAFS spectra of Rh foil at (a) *R* space and (b) *K* space.

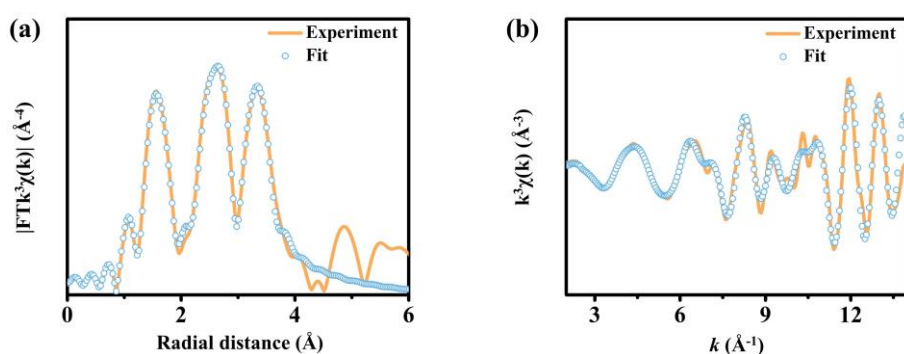

**Supplementary Fig. 9. EXAFS spectra of Rh<sub>2</sub>O<sub>3</sub>.** Rh *K*-edge experimental and fitting Fourier transformed EXAFS spectra of Rh<sub>2</sub>O<sub>3</sub> at (a) *R* space and (b) *K* space.

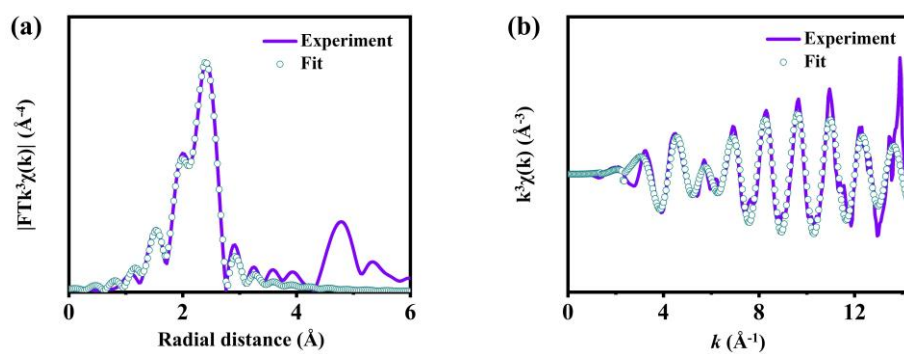

**Supplementary Fig. 10. EXAFS spectra of Cu<sub>SA</sub>-Rh MAs.** Cu *K*-edge experimental and fitting Fourier transformed EXAFS spectra of Cu<sub>SA</sub>-Rh MAs at (a) *R* space and (b) *K* space.

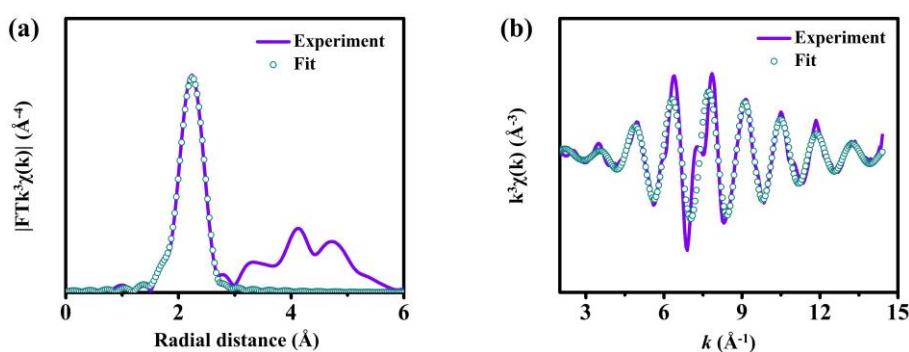

**Supplementary Fig. 11. EXAFS spectra of Cu foil.** Cu *K*-edge experimental and fitting Fourier transformed EXAFS spectra of Cu foil at (a) *R* space and (b) *K* space.

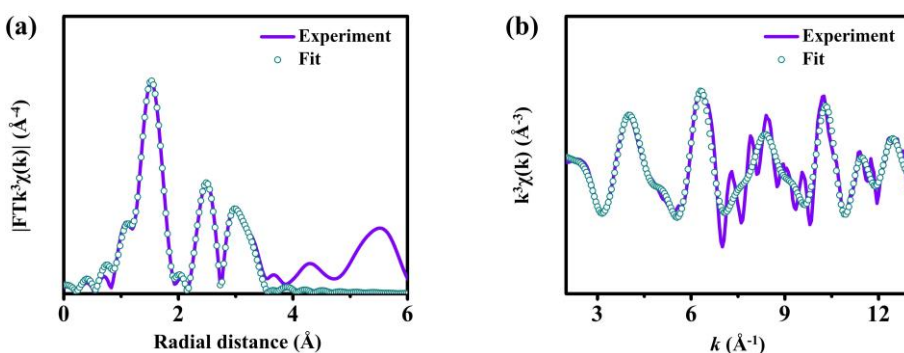

**Supplementary Fig. 12. EXAFS spectra of CuO.** Cu *K*-edge experimental and fitting Fourier transformed EXAFS spectra of CuO at (a) *R* space and (b) *K* space.

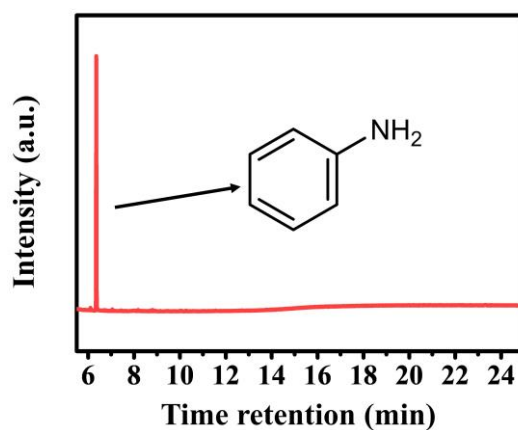

**Supplementary Fig. 13. GC tests.** GC result of Ph-NO<sub>2</sub> ERR for Cu<sub>SA</sub>-Rh MAs/CF at -0.1 V (vs. RHE).

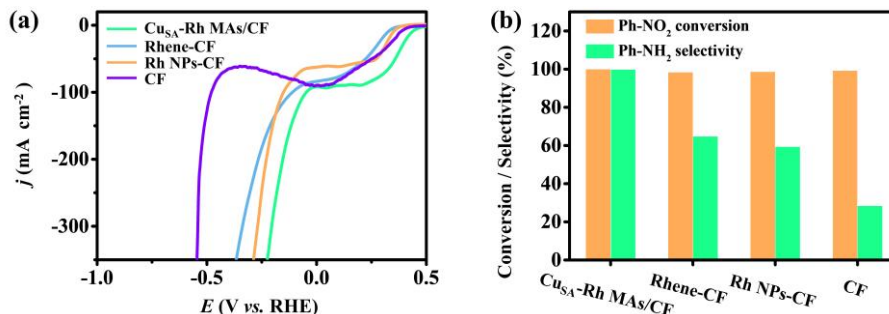

**Supplementary Fig. 14. Electrocatalytic Ph-NO<sub>2</sub> ERR performance of various catalysts.** (a) LSV curves of Cu<sub>SA</sub>-Rh MAs/CF, Rhene-CF, Rh NPs-CF and CF in 1 M KOH + 5 mM Ph-NO<sub>2</sub> solutions. (b) Ph-NO<sub>2</sub> conversion and Ph-NH<sub>2</sub> selectivity of Cu<sub>SA</sub>-Rh MAs/CF, Rhene-CF, Rh NPs-CF and CF at -0.1 V (vs. RHE).



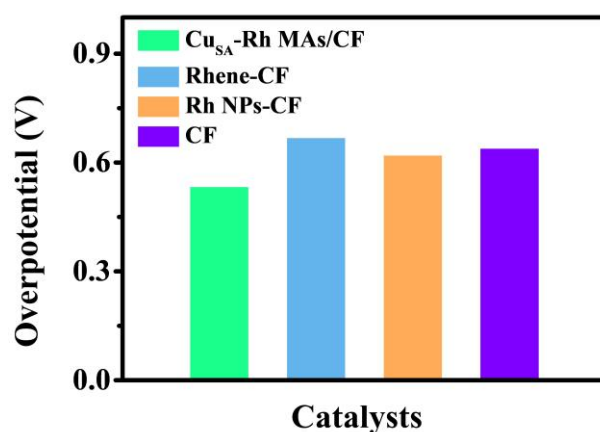

**Supplementary Fig. 15. Overpotential comparison of various catalysts.** Comparison of the overpotential for Cu<sub>SA</sub>-Rh MAS/CF, Rhene-CF, Rh NPs-CF and CF relative to the standard potential of the Ph-NO<sub>2</sub> ERR at a current density of -50 mA cm<sup>-2</sup>.

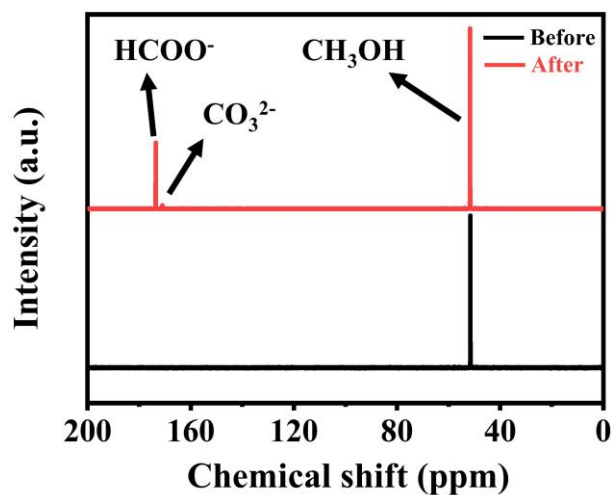

**Supplementary Fig. 16. <sup>13</sup>C NMR spectra analysis.** <sup>13</sup>C NMR spectra of products before and after 24 h MOR for Cu<sub>SA</sub>-Rh MAS/CF at 1.4 V (vs. RHE).

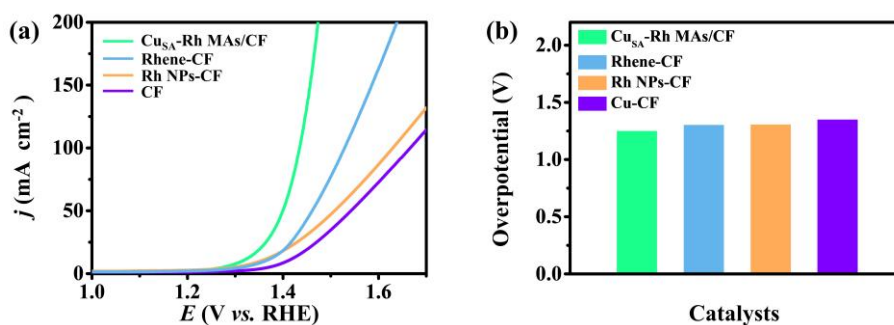

**Supplementary Fig. 17. Electrocatalytic MOR performance of various catalysts.** (a) LSV curves of Cu<sub>SA</sub>-Rh MAs/CF, Rhene-CF, Rh NPs-CF and CF in 1 M KOH + 4 M CH<sub>3</sub>OH solutions. (b) Comparison of the overpotential for Cu<sub>SA</sub>-Rh MAs/CF, Rhene-CF, Rh NPs-CF and CF relative to the standard potential of the MOR at a current density of 20 mA cm<sup>-2</sup>.

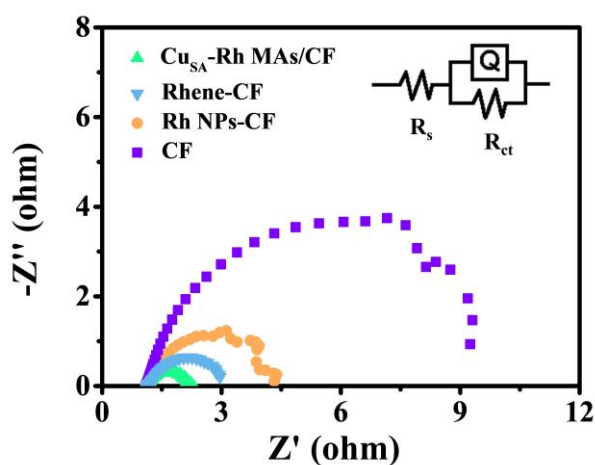

**Supplementary Fig. 18. EIS tests.** EIS plots of Cu<sub>SA</sub>-Rh MAs/CF, Rhene-CF, Rh NPs-CF and CF in 1 M KOH solutions at applied potentials: -0.1 V (vs. RHE).

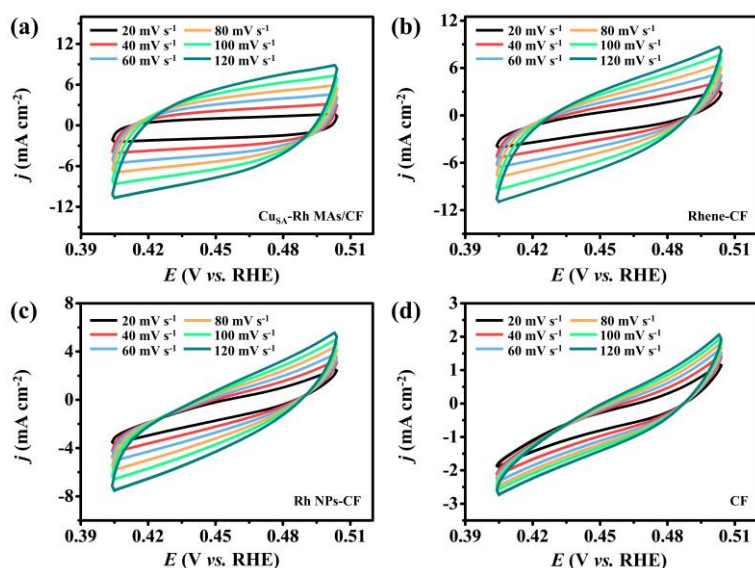

**Supplementary Fig. 19. CV tests.** CVs of (a) Cu<sub>SA</sub>-Rh MAs/CF, (b) Rhene-CF, (c) Rh NPs-CF and (d) CF in the region of 0.404-0.504 V (vs. RHE).

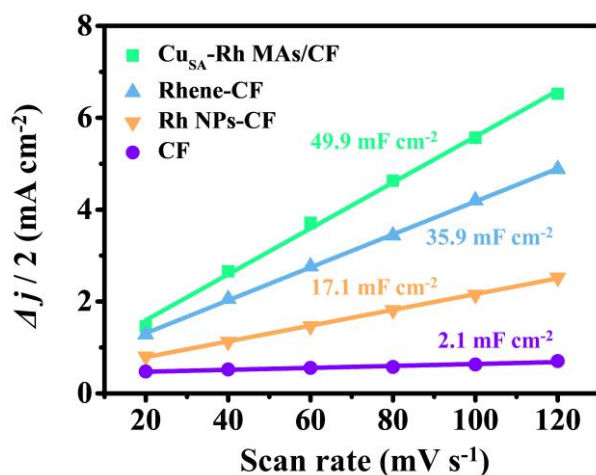

**Supplementary Fig. 20.  $C_{dl}$  values.** Capacitive current densities at 0.454 V (vs. RHE) derived from CVs against scan rates of Cu<sub>SA</sub>-Rh MAs/CF, Rhene-CF, Rh NPs-CF and CF.

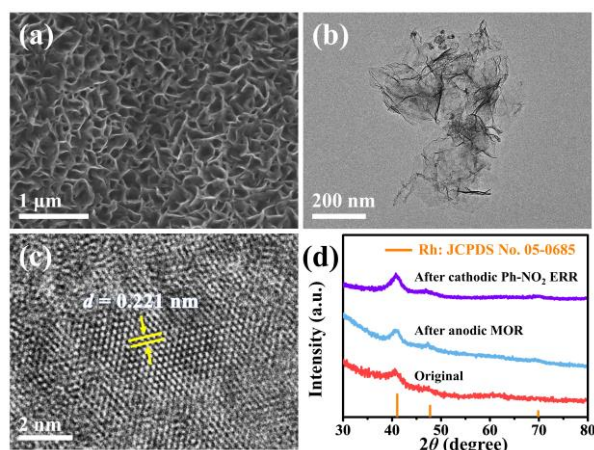

**Supplementary Fig. 21. Morphological and structure characterization after stability testing.** (a) SEM image of Cu<sub>SA</sub>-Rh MAs/CF after stability testing. (b) TEM, and (c) HRTEM images of Cu<sub>SA</sub>-Rh MAs after stability testing. (d) XRD patterns of Cu<sub>SA</sub>-Rh MAs before and after stability testing on cathode and anode.

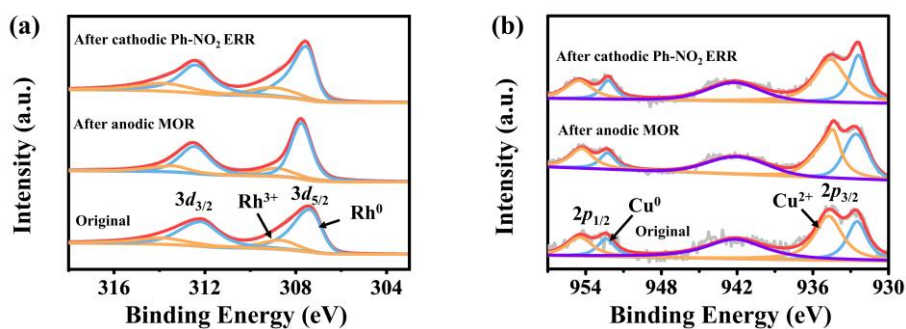

**Supplementary Fig. 22. XPS results after stability testing.** XPS spectra of (a) Rh 3d and (b) Cu 2p for Cu<sub>SA</sub>-Rh MAs before and after stability testing on cathode and anode.

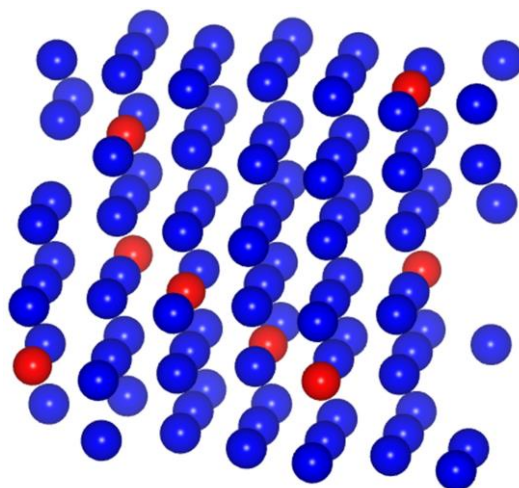

**Supplementary Fig. 23. DFT calculation model.** The optimized geometric structure model for Cu<sub>S</sub>A-Rh MAs.

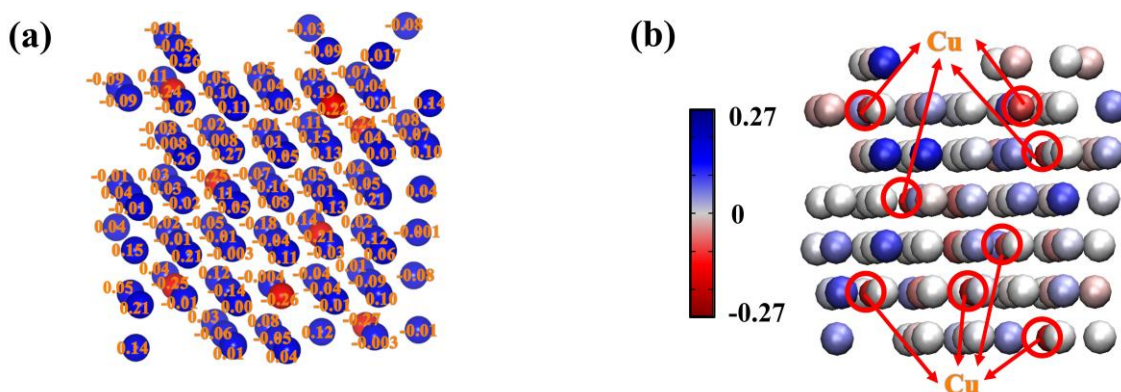

**Supplementary Fig. 24. Bader charge calculation analysis.** (a) Net charge obtained from bader charge analysis marked on Rh (blue balls) and Cu atoms (red balls). (b) Bader charge of Cu<sub>S</sub>A-Rh (the balls marked by red circles represent the tendency for electron transfer on Cu single-atom and the unmarked balls represent the tendency for electron transfer on Rh host).

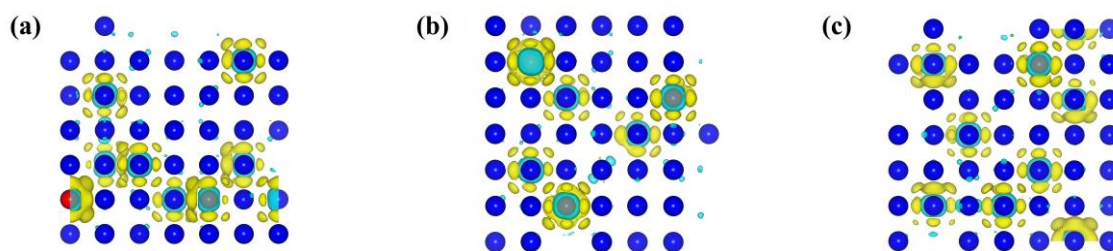

**Supplementary Fig. 25. DFT calculation model.** (a) Main view, (b) side view and (c) top view of charge density difference on  $\text{Cu}_{\text{SA}}\text{-Rh}$ . The blue and red spheres represent Rh and Cu atoms respectively, as well as the yellow and cyan indicate the charge depletion and accumulation areas.

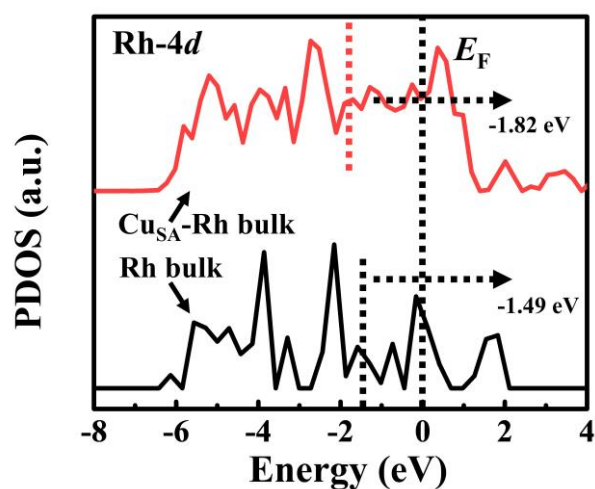

**Supplementary Fig. 26. PDOS results.** The PDOSs for Rh-4d of Rh bulk and  $\text{Cu}_{\text{SA}}\text{-Rh}$  bulk.

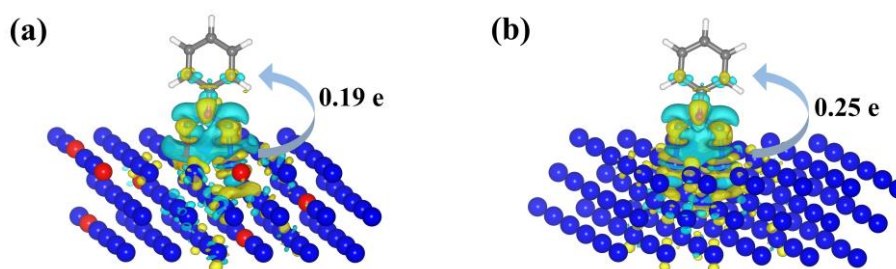

**Supplementary Fig. 27. Charge density difference calculation analysis.** Charge density difference for adsorbed  $\text{Ph-NO}_2^*$  on (a)  $\text{Cu}_{\text{SA}}\text{-Rh}$  (111) and (b) Rh (111). The blue and red spheres represent Rh and Cu atoms respectively, as well as the yellow and cyan indicate the charge depletion and accumulation areas.



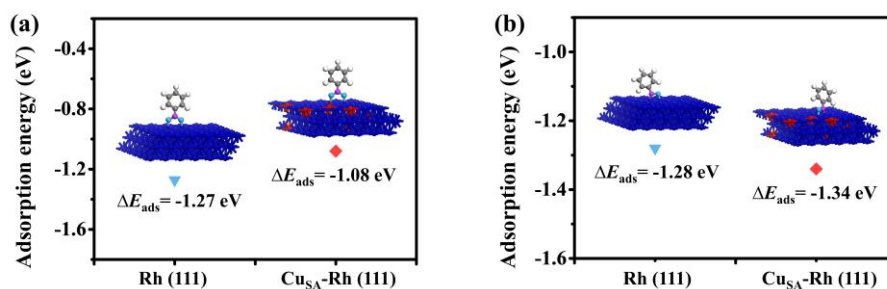

**Supplementary Fig. 28. Adsorption energy calculation.** Calculated adsorption energies of (a) Ph-NO<sub>2</sub>\* and (b) Ph-NO\* on Rh (111) and Cu<sub>SA</sub>-Rh (111).

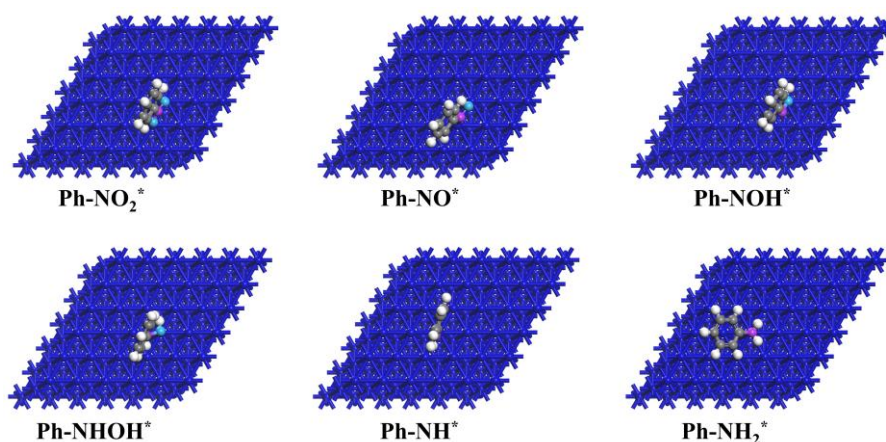

**Supplementary Fig. 29. DFT calculation model.** Optimized structures of Ph-NO<sub>2</sub> ERR intermediates on Rh (111). The blue, gray, cyan, purple, and white spheres represent Rh, C, O, N, and H atoms respectively.

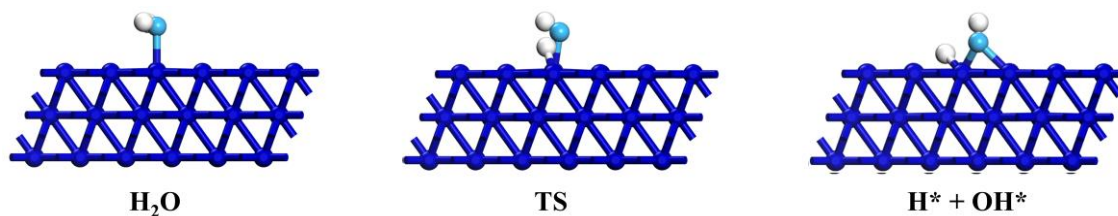

**Supplementary Fig. 30. DFT calculation model.** Optimized structures for the initial, transition and final states of H<sub>2</sub>O dissociation on Rh (111). The blue, cyan, and white spheres represent Rh, O, and H atoms respectively.

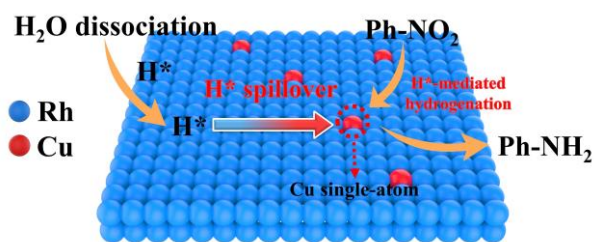

**Supplementary Fig. 31.  $H^*$ -spillover effect mechanism.** Reaction mechanism diagram for hydrogen spillover effect on  $Cu_{SA}$ -Rh during  $Ph-NO_2$  ERR process.

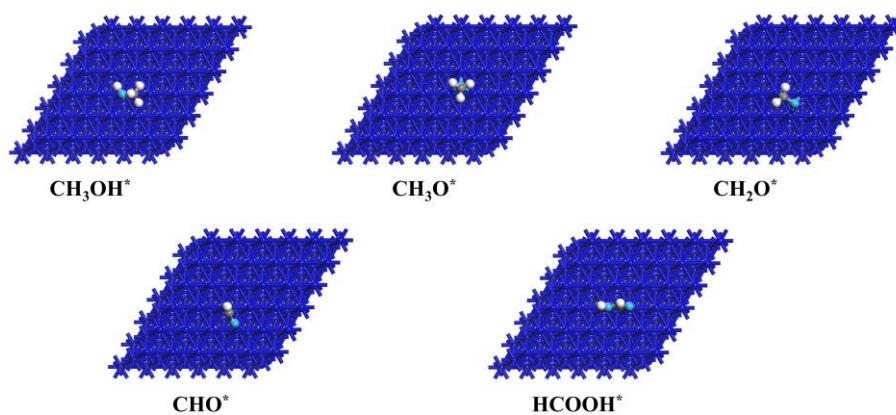

**Supplementary Fig. 32. DFT calculation model.** Optimized structures of MOR intermediates on Rh (111). The blue, gray, cyan, and white spheres represent Rh, C, O, and H atoms respectively.

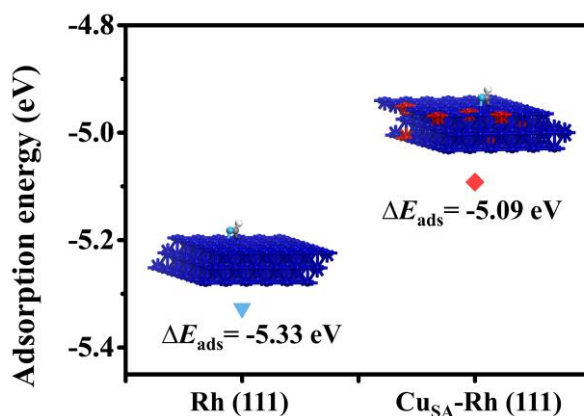

**Supplementary Fig. 33. Adsorption energy calculation.** Calculated adsorption energies of  $CHO^*$  on Rh (111) and  $Cu_{SA}$ -Rh (111).



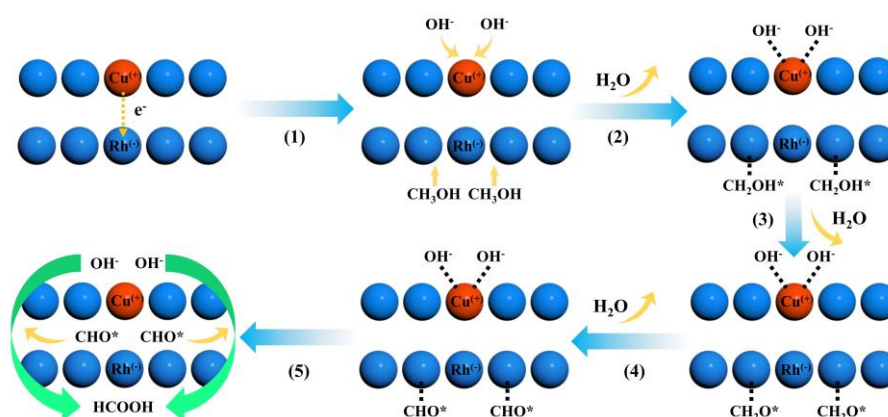

**Supplementary Fig. 34. MOR mechanism.** MOR mechanism diagram of synergistic catalysis induced by electronic effect on Cu<sub>S</sub>A-Rh.

## Supplementary Tables

**Supplementary Table 1.** EXAFS fitting parameters at the Cu *K*-edge for Cu<sub>SA</sub>-Rh MAs.

| Sample                   | Edge | Path  | CN   | R(Å) | $\sigma^2(10^{-3} \text{ Å})$ | $\Delta E_0(\text{eV})$ | R-factor |
|--------------------------|------|-------|------|------|-------------------------------|-------------------------|----------|
| Cu <sub>SA</sub> -Rh MAs | Cu-K | Cu-N  | 0.35 | 1.87 | 1.00                          | 21.65                   | 0.007    |
|                          |      | Cu-O  | 1.27 | 2.04 | 9.63                          | 19.69                   |          |
|                          |      | Cu-Rh | 4.78 | 2.63 | 6.32                          | 7.39                    |          |

CN, coordination number; R, distance between absorber and backscatter atoms.  $\sigma^2$ , Debye-Waller factor;  $\Delta E_0$ , the inner potential difference between the reference compound and the experimental sample. R-factor, the goodness of fit.

**Supplementary Table 2.** Bader charge analysis for Cu<sub>SA</sub>-Rh. The electron transformation is 1.94e from Cu to Rh.

| Atom species | Bader charge (e) |
|--------------|------------------|
| Rh           | 1.94             |
| Cu           | -1.94            |

**Supplementary Table 3.** Bader charge analysis for adsorbed Ph-NO<sub>2</sub>\* on Cu<sub>SA</sub>-Rh (111) and Rh (111).

| Species                    | Bader charge (e) |
|----------------------------|------------------|
| Cu <sub>SA</sub> -Rh (111) | 0.19             |
| Rh (111)                   | 0.25             |

**Supplementary Table 4.** Calculated adsorption energy values of Ph-NO<sub>2</sub>\* and Ph-NO\* on Rh (111) and Cu<sub>SA</sub>-Rh (111).

| Reactant/Intermediates | Cu <sub>SA</sub> -Rh (111) | Rh (111) |
|------------------------|----------------------------|----------|
| Ph-NO <sub>2</sub> *   | -1.08 eV                   | -1.27 eV |
| Ph-NO*                 | -1.34 eV                   | -1.28 eV |

**Supplementary Table 5.** Calculated free energy values of various intermediates for Ph-NO<sub>2</sub> ERR pathway on Cu<sub>SA</sub>-Rh (111) and Rh (111).

| Reactant/Intermediates | Cu <sub>SA</sub> -Rh (111) | Rh (111)  |
|------------------------|----------------------------|-----------|
| Ph-NO <sub>2</sub>     | 0 eV                       | 0 eV      |
| Ph-NO <sub>2</sub> *   | -0.387 eV                  | -0.580 eV |
| Ph-NO*                 | -2.689 eV                  | -2.578 eV |
| Ph-NOH*                | -2.462 eV                  | -2.212 eV |
| Ph-NHOH*               | -1.725 eV                  | -1.915 eV |
| Ph-NH*                 | -4.555 eV                  | -4.095 eV |
| Ph-NH <sub>2</sub> *   | -3.923 eV                  | -5.072 eV |
| Ph-NH <sub>2</sub>     | -4.227 eV                  | -4.227 eV |

**Supplementary Table 6.** Calculated energy values of the initial, transition and final states of H<sub>2</sub>O dissociation on Cu<sub>5</sub>A-Rh (111) and Rh (111).

| Reactant/Intermediates | Cu <sub>5</sub> A-Rh (111) | Rh (111) |
|------------------------|----------------------------|----------|
| H <sub>2</sub> O (IS)  | 0 eV                       | 0 eV     |
| TS                     | 0.832 eV                   | 1.010 eV |
| H* + OH* (FS)          | -0.237 eV                  | 0.117 eV |

**Supplementary Table 7.** Calculated H\* adsorption energy values at different sites on Cu<sub>SA</sub>-Rh (111).

| Sites | Adsorption energy (eV) |
|-------|------------------------|
| A     | -0.26                  |
| B     | -0.27                  |
| C     | -0.29                  |
| D     | -0.31                  |
| E     | -0.47                  |



**Supplementary Table 8.** Calculated free energy values of various intermediates for MOR pathway on Cu<sub>SA</sub>-Rh (111) and Rh (111).

| Reactant/Intermediates | Cu <sub>SA</sub> -Rh (111) | Rh (111) |
|------------------------|----------------------------|----------|
| CH <sub>3</sub> OH     | 0                          | 0        |
| CH <sub>3</sub> OH*    | -0.400                     | -0.642   |
| CH <sub>3</sub> O*     | -0.409                     | -0.492   |
| CH <sub>2</sub> O*     | -0.068                     | -0.266   |
| CHO*                   | 0.614                      | -0.514   |
| HCOOH*                 | 0.217                      | 0.110    |
| HCOOH                  | 0.647                      | 0.647    |

**Supplementary Table 9.** Calculated adsorption energy values of CHO\* on Rh (111) and Cu<sub>SA</sub>-Rh (111).

| Reactant/Intermediates | Cu <sub>SA</sub> -Rh (111) | Rh (111) |
|------------------------|----------------------------|----------|
| CHO*                   | -5.09 eV                   | -5.33 eV |

## Supplementary References

1. Kresse G & Furthmüller J. Efficiency of ab-initio total energy calculations for metals and semiconductors using a plane-wave basis set. *Comput. Mater. Sci.* **6**, 15-50 (1996).
2. Blochl PE. Projector augmented-wave method. *Phys. Rev. B Condens. Matter* **50**, 17953-17979 (1994).
3. Perdew JP, et al. Atoms, molecules, solids, and surfaces: Applications of the generalized gradient approximation for exchange and correlation. *Phys. Rev. B Condens. Matter* **46**, 6671-6687 (1992).
4. Grimme S, Antony J, Ehrlich S & Krieg H. A consistent and accurate ab initio parametrization of density functional dispersion correction (DFT-D) for the 94 elements H-Pu. *J. Chem. Phys.* **132**, 154104 (2010).
